# Supplementary material
Source: MDPI journal article supplement (https://www.mdpi.com/2073-4441/13/15/2086)
Supplement: s1 [file s1]

**Table S1.** List of species and GenBank accession numbers of their gene sequences used in the phylogenetic analysis based on the maximum-likelihood trees (Figure 8 A, B, C). Haplotypes found in our study are in bold.

| Scientific Name                             | GenBank<br>Accession<br>Number | Sequence Source             | Country/<br>Localization |
|---------------------------------------------|--------------------------------|-----------------------------|--------------------------|
| <i>Cyclops</i> – 12S rRNA gene (Fig. 8A)    |                                |                             |                          |
| <i>Cyclops abyssorum</i>                    | KP773124                       | Krajiček et al. 2016        | Czech Republic           |
| <i>Cyclops abyssorum</i>                    | KP773138                       | Krajiček et al. 2016        | Czech Republic           |
| <i>Cyclops bohater</i>                      | KP773187                       | Krajiček et al. 2016        | Germany                  |
| <b><i>Cyclops furcifer</i></b>              | <b>MZ502237</b>                | <b>This study</b>           | <b>Poland</b>            |
| <i>Cyclops heberti</i>                      | KP773085                       | Krajiček et al. 2016        | Czech Republic           |
| <i>Cyclops heberti</i>                      | KP773157                       | Krajiček et al. 2016        | Germany                  |
| <i>Cyclops insignis</i>                     | KP773084                       | Krajiček et al. 2016        | Czech Republic           |
| <i>Cyclops insignis</i>                     | KP773101                       | Krajiček et al. 2016        | Czech Republic           |
| <i>Cyclops kikuchii</i>                     | LC537286                       | Sioud et al. 2020           | Japan                    |
| <i>Cyclops kikuchii</i>                     | LC537291                       | Sioud et al. 2020           | Japan                    |
| <i>Cyclops ochridanus</i>                   | KP773147                       | Krajiček et al. 2016        | Albania                  |
| <i>Cyclops scutifer</i>                     | MK329326                       | Holýńska & Wyngaard 2019    | Canada                   |
| <i>Cyclops scutifer</i>                     | MK329328                       | Holýńska & Wyngaard 2019    | Sweden                   |
| <i>Cyclops vicinus</i>                      | LC537293                       | Sioud et al. 2020           | Japan                    |
| <i>Cyclops vicinus</i>                      | LC537295                       | Sioud et al. 2020           | Japan                    |
| <i>Eucyclops</i> – COI gene (Fig. 8B)       |                                |                             |                          |
| <i>Eucyclops cuatrocieneegas</i>            | MG449344                       | Elías-Gutiérrez et al. 2018 | Mexico                   |
| <i>Eucyclops</i> cf. <i>cuatrocieneegas</i> | MG449658                       | Elías-Gutiérrez et al. 2018 | Mexico                   |
| <i>Eucyclops</i> cf. <i>estherae</i>        | HM884024                       | Unpublished                 | USA                      |
| <i>Eucyclops</i> cf. <i>serrulatus</i>      | KC627303                       | Unpublished                 | Russia                   |
| <i>Eucyclops</i> cf. <i>serrulatus</i>      | KC627312                       | Unpublished                 | Russia                   |
| <i>Eucyclops</i> cf. <i>serrulatus</i>      | KC627313                       | Unpublished                 | Ukraine                  |
| <i>Eucyclops</i> cf. <i>serrulatus</i>      | KP845498                       | Watson et al. 2015          | New Zealand              |
| <b><i>Eucyclops serrulatus</i></b>          | <b>MZ503631</b>                | <b>This study</b>           | <b>Poland</b>            |
| <b><i>Eucyclops serrulatus</i></b>          | <b>MZ503632</b>                | <b>This study</b>           | <b>Poland</b>            |
| <i>Eucyclops macrurus</i>                   | KC627334                       | Unpublished                 | Russia                   |
| <i>Eucyclops macrurus</i>                   | KC627335                       | Unpublished                 | Russia                   |
| <i>Eucyclops prionophorus</i>               | MG449753                       | Elías-Gutiérrez et al. 2018 | Canada                   |
| <i>Eucyclops prionophorus</i>               | MG449804                       | Elías-Gutiérrez et al. 2018 | Mexico                   |
| <i>Eucyclops speratus</i>                   | KC627338                       | Unpublished                 | Russia                   |
| <i>Eucyclops speratus</i>                   | KY231382                       | Bhavan et al. 2016          | India                    |
| <i>Cyclops insignis</i>                     | KC627294                       | Unpublished                 | Russia                   |
| <i>Cyclops ohridanus</i>                    | MF114115                       | Mayor et al. 2017           | Macedonia                |
| <i>Diacyclops</i> – COI gene (Fig. 8C)      |                                |                             |                          |
| <i>Diacyclops</i> sp.                       | GU055760                       | Mayor et al. 2010           | Russia                   |
| <i>Diacyclops</i> sp.                       | MK207028                       | Mayor et al. 2019           | Russia                   |
| <i>Diacyclops</i> sp.                       | MK207029                       | Mayor et al. 2019           | Russia                   |
| <i>Diacyclops</i> sp.                       | MK207035                       | Mayor et al. 2019           | Russia                   |
| <i>Diacyclops</i> sp.                       | MK207039                       | Mayor et al. 2019           | Russia                   |
| <i>Diacyclops bicuspidatus</i>              | KR048968                       | Baek et al. 2016            | South Korea              |
| <b><i>Diacyclops bisetosus</i></b>          | <b>MZ503633</b>                | <b>This study</b>           | <b>Poland</b>            |
| <b><i>Diacyclops bisetosus</i></b>          | <b>MZ503634</b>                | <b>This study</b>           | <b>Poland</b>            |

|                                |          |                     |        |
|--------------------------------|----------|---------------------|--------|
| <i>Diacyclops crassicaudis</i> | MZ503635 | This study          | Poland |
| <i>Diacyclops crassicaudis</i> | MZ503636 | This study          | Poland |
| <i>Diacyclops crassicaudis</i> | MZ503637 | This study          | Poland |
| <i>Diacyclops eulitoralis</i>  | GU055758 | Mayor et al. 2010   | Russia |
| <i>Diacyclops galbinus</i>     | GU055755 | Mayor et al. 2010   | Russia |
| <i>Diacyclops konstantini</i>  | GU055757 | Mayor et al. 2010   | Russia |
| <i>Diacyclops konstantini</i>  | MT176789 | Unpublished         | Russia |
| <i>Macrocyclus albidus</i>     | KC617660 | Prosser et al. 2013 | Mexico |
| <i>Megacyclus viridis</i>      | KC627345 | Unpublished         | Russia |

Baek, S. Y., Jang, K. H., Choi, E. H., Ryu, S. H., Kim, S. K., Lee, J. H., ... & Hwang, U. W. (2016). DNA barcoding of metazoan zooplankton copepods from South Korea. *PloS one*, 11(7), e0157307.

Bhavan, P. S., Udayasuriyan, R., Vadivalagan, C., Kalpana, R., & Umamaheswari, S. (2016). Diversity of zooplankton in four perennial lakes of Coimbatore (India) and molecular characterization of Asplanchna intermedia, Moina micrura, Mesocyclops edax and Cypris protuberata through mt-COI gene. *Journal of Entomology and Zoology Studies*, 4(2), 183-197.

Elías-Gutiérrez, M., Valdez-Moreno, M., Topan, J., Young, M. R., & Cohuo-Colli, J. A. (2018). Improved protocols to accelerate the assembly of DNA barcode reference libraries for freshwater zooplankton. *Ecology and evolution*, 8(5), 3002-3018.

Hołyńska, M., & Wyngaard, G. A. (2019). Towards a phylogeny of Cyclops (Copepoda):(in) congruences among morphology, molecules and zoogeography. *Zoologica Scripta*, 48(3), 376-398.

Krajiček, M., Fott, J., Miracle, M. R., Ventura, M., Sommaruga, R., Kirschner, P., & Černý, M. (2016). The genus Cyclops (Copepoda, Cyclopoida) in Europe. *Zoologica Scripta*, 45(6), 671-682.

Mayor, T. Y., Galimova, Y. A., Sheveleva, N. G., Sukhanova, L. V., & Kirilchik, S. V. (2017). Molecular phylogenetic analysis of Diacyclops and Acanthocyclops (Copepoda: Cyclopoida) from Lake Baikal based on COI gene. *Russian Journal of Genetics*, 53(2), 252-258.

Mayor, T. Y., Sheveleva, N. G., Sukhanova, L. V., Timoshkin, O. A., & Kiril'chik, S. V. (2010). Molecular-phylogenetic analysis of cyclopoids (Copepoda: Cyclopoida) from Lake Baikal and its water catchment basin. *Russian Journal of Genetics*, 46(11), 1373-1380.

Mayor, T. Y., Zaidykov, I. Y., & Kirilchik, S. V. (2019). Morphological and genetic polymorphism of new Diacyclops taxonomic group from Lake Baikal (Copepoda: Cyclopoida). *Limnology and Freshwater Biology*, 163-171.

Prosser, S., Martínez-Arce, A., & Elías-Gutiérrez, M. (2013). A new set of primers for COI amplification from freshwater microcrustaceans. *Molecular ecology resources*, 13(6), 1151-1155.

Sioud, I., Makino, W., & Urabe, J. (2021). Differential intraspecific genetic variations of the closely related, wide-ranged freshwater copepods Cyclops vicinus Uljanin, 1875 and C. kikuchii Smirnov, 1932. *Limnology*, 22(2), 209-219.

Watson, N. T. N., Duggan, I. C., & Hogg, I. D. (2015). Assessing the diversity of New Zealand freshwater harpacticoid copepods (Crustacea: Copepoda) using mitochondrial DNA (COI) barcodes. *New Zealand Journal of Zoology*, 42(2), 57-67.
