# Supplementary material
Source: MDPI journal article supplement (https://www.mdpi.com/2073-4441/13/15/2086)
Supplement: s1 [file s1]

## Supplementary Materials

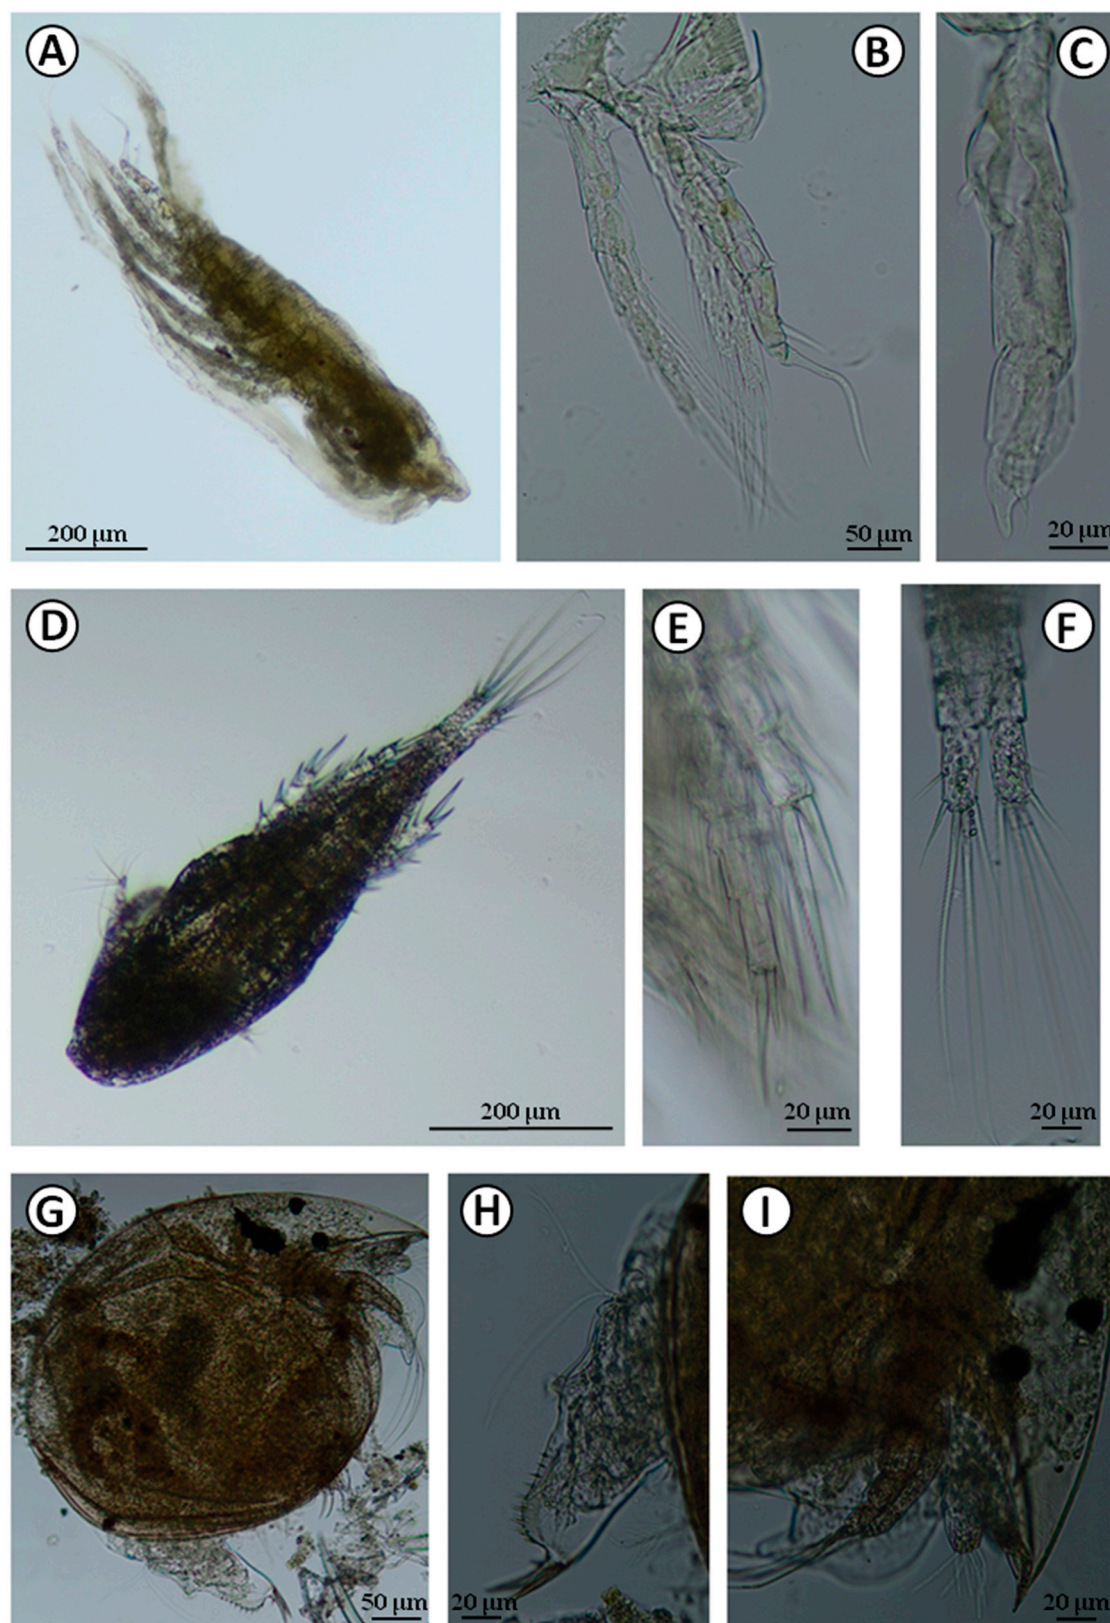

**Figure S1.** Photography of species considered as stygoxenes. *Eudiaptomus gracilis*: **A** – body (male); **B** – P4 and exopodite of P5; **C** – endopodite of P5. *Thermocyclops crassus*: **D** – body; **E** – last segment of exopodite P4; **F** – furcal branches. *Chydorus sphaericus*: **G** – body; **H** – postabdomen; **I** – head and labral plate.
